# Supplementary material for: Lifestyle, gene gain and loss, and transcriptional remodeling cause divergence in the transcriptomes of Phytophthora infestans and Pythium ultimum during potato tuber colonization
Source: PubMed Central journal article supplement (PMC5635513; doi:10.1186/s12864-017-4151-2), 2017-10-10
Supplement: 12864_2017_4151_MOESM1_ESM.pdf [file 12864_2017_4151_MOESM1_ESM.pdf]

Table S1. RNA-seq statistics.

| Species              | Condition    | Biological replicates | Total reads   | Reads mapped to pathogen | Per cent mapped |
|----------------------|--------------|-----------------------|---------------|--------------------------|-----------------|
| <i>Ph. infestans</i> | Rye early    | 3                     | 321,535,026   | 287,788,693              | 89.5            |
|                      | Rye late     | 3                     | 271,184,730   | 240,519,772              | 88.7            |
|                      | Pea early    | 3                     | 299,350,646   | 270,669,569              | 90.4            |
|                      | Pea late     | 3                     | 303,352,320   | 270,782,855              | 89.3            |
|                      | Tuber early  | 3                     | 1,050,012,734 | 40,645,641               | 3.9             |
|                      | Tuber middle | 3                     | 1,266,994,058 | 383,656,380              | 30.3            |
|                      | Tuber late   | 3                     | 927,870,736   | 708,776,144              | 76.4            |
| <i>Py. ultimum</i>   | Rye early    | 3                     | 230,807,200   | 216,528,025              | 93.8            |
|                      | Rye late     | 3                     | 216,908,728   | 203,271,994              | 93.7            |
|                      | Pea early    | 3                     | 208,553,786   | 194,253,631              | 93.1            |
|                      | Pea late     | 3                     | 186,757,304   | 173,097,089              | 92.7            |
|                      | Tuber early  | 3                     | 461,099,278   | 113,754,907              | 24.7            |
|                      | Tuber middle | 3                     | 207,358,216   | 182,141,252              | 87.8            |
|                      | Tuber late   | 3                     | 246,459,330   | 222,079,444              | 90.1            |
